# Supplementary material for: Two metal–organic frameworks based on pyridyl–tricarboxylate ligands as size-selective catalysts for solvent-free cyanosilylation reaction
Source: Royal Society of Chemistry journal article supplement (doi:10.1039/c8ce00694f), 2018-01-01
Supplement: c8ce00694f1.pdf [file c8ce00694f1.pdf]

## Electronic Supplementary Information (ESI)

### **Two metal-organic frameworks based on pyridyl-tricarboxylate ligand as size-selective catalysts for solvent-free cyanosilylation reaction**

Yiwen Zhang,<sup>ab</sup> Kongzhao Su,<sup>a</sup> Miao Hao,<sup>b</sup> Lin Liu,<sup>\*b</sup> Zheng-Bo Han<sup>b</sup> and Daqiang Yuan<sup>\*a</sup>

<sup>a</sup>State Key Laboratory of Structure Chemistry, Fujian Institute of Research on the Structure of Matter, Chinese Academy of Sciences, Fuzhou, Fujian, 350002, China E-mail: ydq@firms.ac.cn

<sup>b</sup>College of Chemistry, Liaoning University, Shenyang 110036 P.R. China E-mail: ceshzb@lnu.edu.cn

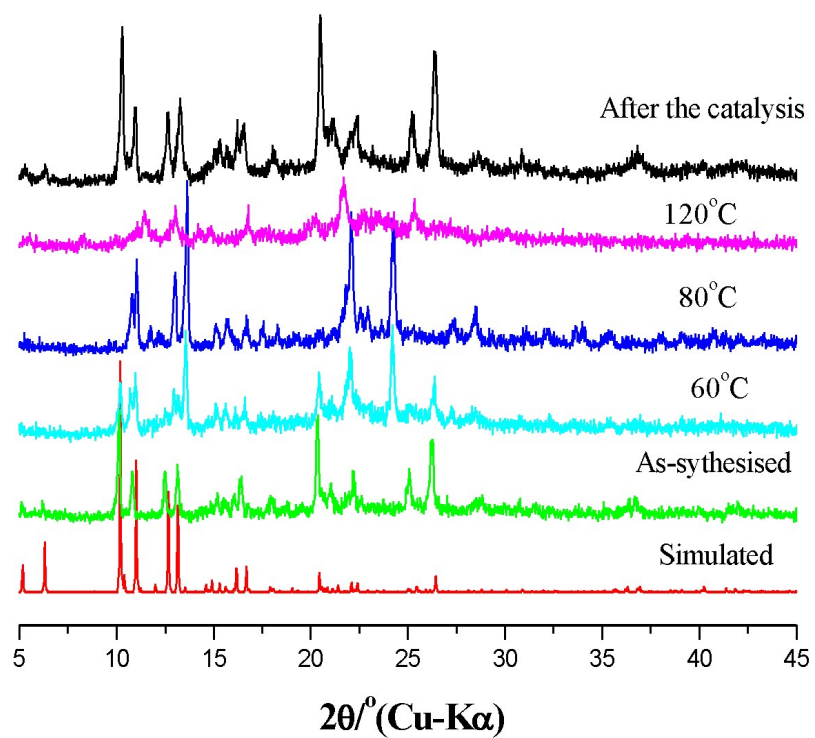

**Fig. S1** Simulated and experimental X-ray powder diffraction patterns for **FJI-Y7**.

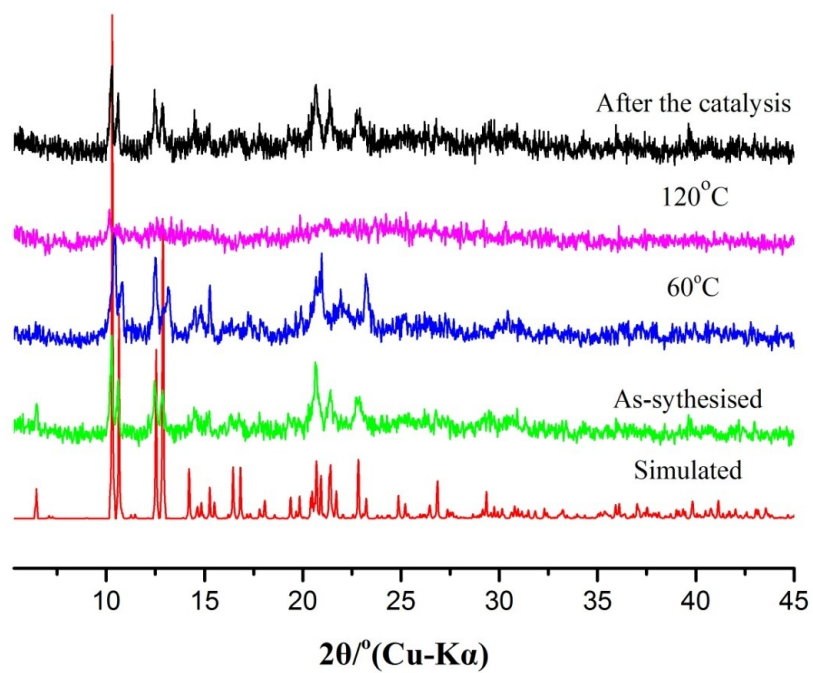

**Fig. S2** Simulated and experimental X-ray powder diffraction patterns for **FJI-Y8**.

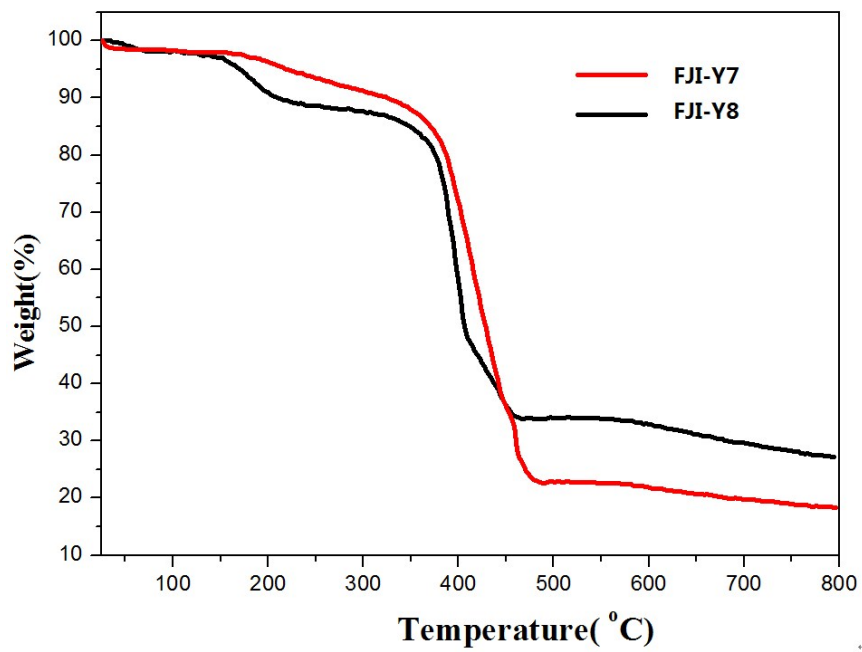

**Fig. S3** TGA curves of FJI-Y7 and FJI-Y8.

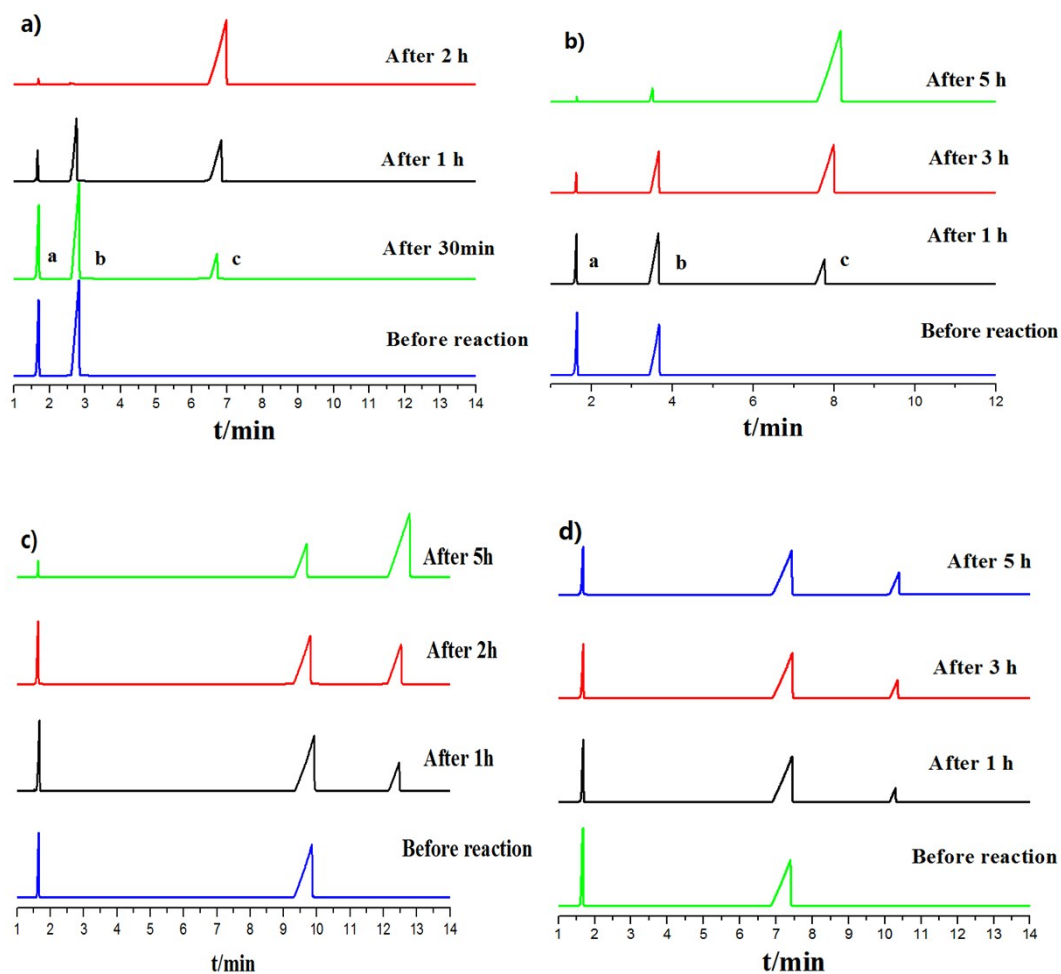

**Fig. S4** The GC of the reactions of (a) n-Heptaldehyde and Cyanotrimethylsilane (b) Benzaldehyde and Cyanotrimethylsilane, (c) 1-Naphthaldehyde and Cyanotrimethylsilane, (d) p-anisaldehyde and Cyanotrimethylsilane, catalyzed by FJI-Y7.

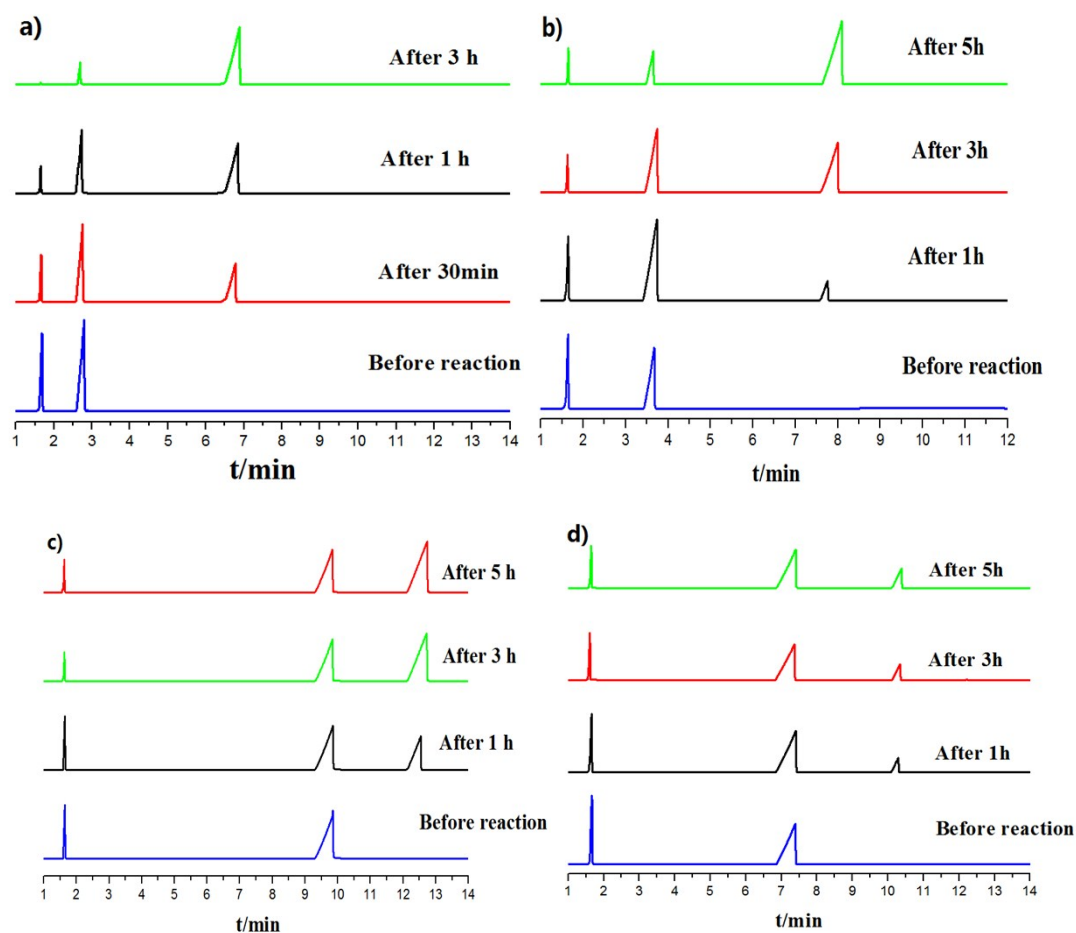

**Fig. S5** The GC of the reactions of (a) n-Heptaldehyde and Cyanotrimethylsilane (b) Benzaldehyde and Cyanotrimethylsilane, (c) 1-Naphthaldehyde and Cyanotrimethylsilane, (d) p-anisaldehyde and Cyanotrimethylsilane, catalyzed by **FJI-Y8**.

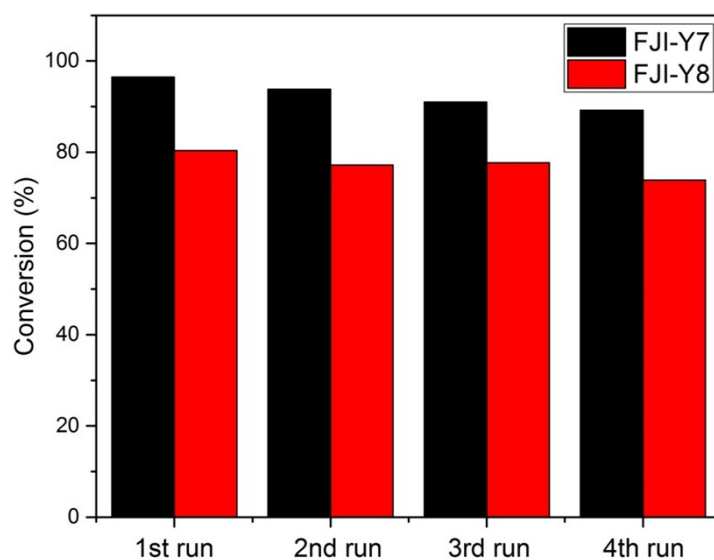

**Fig. S6.** Recycling experiments for cyanosilylation of benzaldehyde catalyzed by **FJI-Y7** and **FJI-Y8**. Reaction conditions: benzaldehyde (4 mmol), Trimethylsilyl cyanide (4 mmol), catalyst (0.05 mmol), 40 °C, N<sub>2</sub> atmosphere.

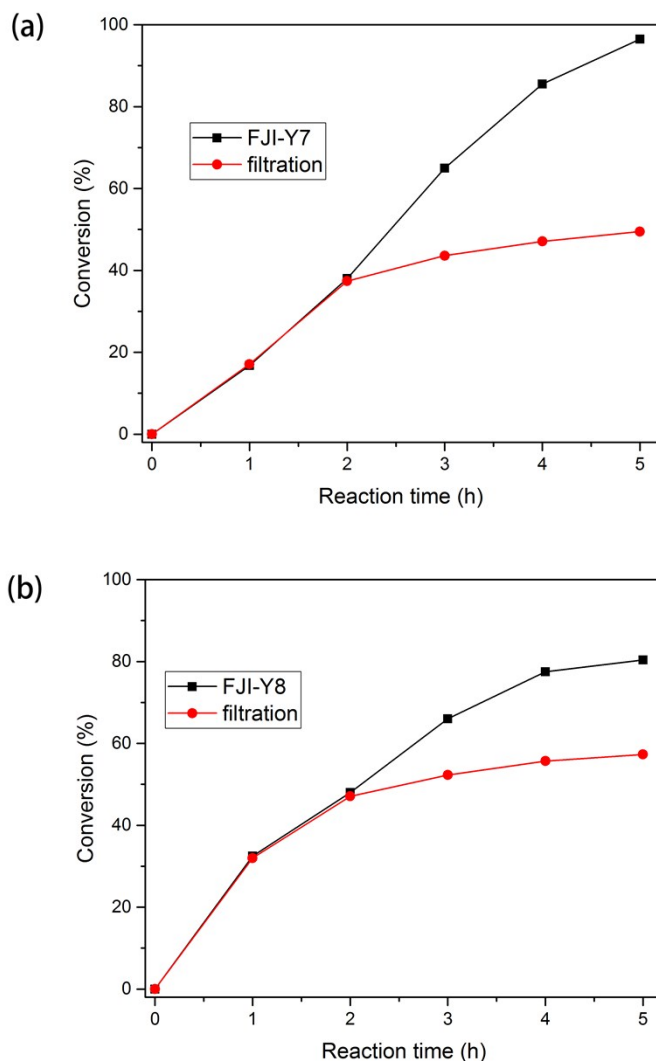

**Fig. S7.** Catalyst leaching tests for the cyanosilylation reaction of benzaldehyde and Trimethylsilyl cyanide catalyzed by **FJI-Y7** (a) and **FJI-Y8** (b).

The mixture of catalyst (0.05 mmol), aldehyde (4 mmol), TMSCN (4 mmol) was stirred at 40 °C under N<sub>2</sub> atmosphere. After 2h, the catalysts were isolated from the mixture *via* filtration, then the remaining filtrate react continually at 40 °C. As shown in Fig. S7, comparing with the reactions without removal of catalysts, the reaction rates of the leaching tests decrease dramatically after removal of catalysts, implying the loss of the main active species. GC analysis revealed that no dissolved ligand were existed in the filtrate.

**Table S1. Cyanosilylation of benzaldehyde (comparison of yields)**

| Catalyst                                                                                                                         | Solvent                         | Temp. K | Time /h | Yield % | Ref |
|----------------------------------------------------------------------------------------------------------------------------------|---------------------------------|---------|---------|---------|-----|
| MIL-101(0.5 mol%)                                                                                                                | heptane                         | 313     | 3       | 98.5    | S1  |
| Mn <sub>3</sub> [(Mn <sub>4</sub> Cl) <sub>3</sub> (BTT) <sub>8</sub> (CH <sub>3</sub> OH) <sub>10</sub> ] <sub>2</sub> (11mol%) | CH <sub>2</sub> Cl <sub>2</sub> | 298     | 9       | 98      | S2  |

|                                                                                                                                                                                                               |                                 |     |     |      |           |
|---------------------------------------------------------------------------------------------------------------------------------------------------------------------------------------------------------------|---------------------------------|-----|-----|------|-----------|
| Cu <sub>3</sub> (BTC) <sub>2</sub> (5mol%)                                                                                                                                                                    | CH <sub>2</sub> Cl <sub>2</sub> | 313 | 48  | 50   | S3        |
| (O <sub>2</sub> H <sub>3</sub> )Sc-MOF(5 mol%)                                                                                                                                                                | ethanol                         | 313 | 8   | 84   | S4        |
| (μ-OH) <sub>6</sub> Sc-MOF(5 mol%)                                                                                                                                                                            | ethanol                         | 313 | 8.5 | 77.3 | S4        |
| (Phen)Sc-MOF(5 mol%)                                                                                                                                                                                          | ethanol                         | 313 | 7   | 55   | S4        |
| [Cd <sub>3</sub> (tipp)(bpdc) <sub>2</sub> ]·DMA·9H <sub>2</sub> O(0.6mol%)                                                                                                                                   | Solvent-Free                    | 298 | 18  | 94   | S5        |
| [Me <sub>2</sub> NH <sub>2</sub> ][Co <sub>2</sub> (bptc)(μ <sub>3</sub> -OH)(H <sub>2</sub> O) <sub>2</sub> ] (0.1 mol %)                                                                                    | Solvent-Free                    | 298 | 12  | 98   | S6        |
| {[Zn <sub>3</sub> (4,4'-bpy) <sub>3.5</sub> (□-<br>O <sub>2</sub> CH) <sub>4</sub> (H <sub>2</sub> O) <sub>2</sub> ](ClO <sub>4</sub> ) <sub>2</sub> (H <sub>2</sub> O) <sub>2</sub> ] <sub>n</sub> (5 mol %) | CH <sub>2</sub> Cl <sub>2</sub> | 298 | 24  | 22   | S7        |
| [Cu <sub>2</sub> (bpy)(H <sub>2</sub> O) <sub>5.5</sub> ] <sub>2</sub> [H <sub>2</sub> W <sub>11</sub> O <sub>38</sub> ]·3H <sub>2</sub> O·0.5C<br>H <sub>3</sub> CN (2 mol %)                                | CH <sub>2</sub> Cl <sub>2</sub> | 313 | 24  | 98.1 | S8        |
| DUT-4 (4 mol%)                                                                                                                                                                                                | N-heptane                       | 313 | 12  | ~100 | S9        |
| <b>FJI-Y7</b> (1.25 mol%)                                                                                                                                                                                     | Solvent-Free                    | 313 | 5   | 96.5 | This work |
| <b>FJI-Y8</b> (1.25 mol%)                                                                                                                                                                                     | Solvent-Free                    | 313 | 5   | 80.4 | This work |

## References

- S1.** Henschel, A.; Gedrich, K.; Kraehnert, R.; Kaskel, S. *Chem. Commun.* **2008**, 4192–4194.
- S2.** Horike, S.; Dincă, M.; Tamaki, K.; Long, J. R. *J. Am. Chem. Soc.* **2008**, *130*, 5854–5855.
- S3.** Schlichte, K.; Kratzke, T.; Kaskel, S. *Micropor. Mesopor. Mater.* **2004**, *73*, 81–88.
- S4.** D’Vries, R. F.; de la Peña-O’Shea, V. A.; Snejko, N.; Iglesias, M.; Gutiérrez-Puebla, E.; Monge, M. A. *J. Am. Chem. Soc.* **2013**, *135*, 5782–5792.
- S5.** Jiang, W., Yang, J., Liu, Y. Y., Song, S. Y., & Ma, J. F. *Inorganic chemistry*, **2017**, *56*(5), 3036-3043.
- S6.** Cui, X., Xu, M. C., Zhang, L. J., Yao, R. X., & Zhang, X. M. *Dalton Transactions*, **2015**, *44*(28), 12711-12716.
- S7.** Phuengphai, P.; Youngme, S.; Gamez, P.; Reedijk, J. *Dalton Trans.* **2010**, *39*, 7936–7942.
- S8.** Han, Q.; Sun, X.; Li, J.; Ma, P.; Niu, J. *Inorg. Chem.* **2014**, *53*, 6107–6112.
- S9.** Lohe, M. R.; Gedrich, K.; Freudenberg, T.; Kockrick, E. *Chem. Commun.* **2011**, *47*, 3075 – 3077.
